# Supplementary material
Source: PubMed Central journal article supplement (PMC539783)
Supplement: pnas_101_51_17741__1.pdf [file pnas_101_51_17741__1.pdf]

**A** *mt atp1*

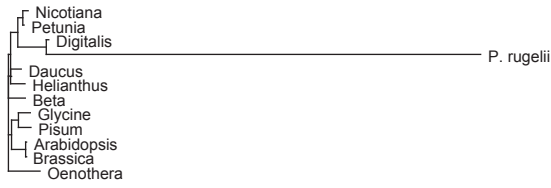

*mt cox1*

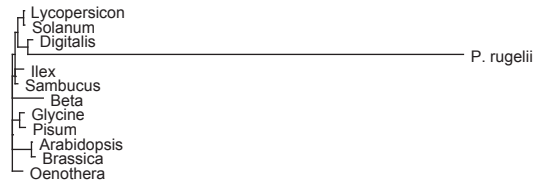

*mt cob*

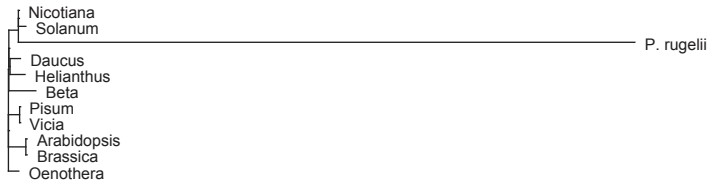

*mt cox2*

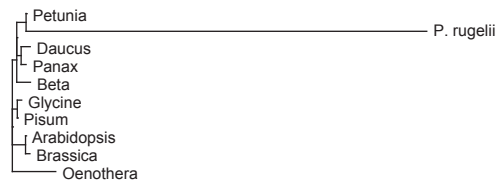

*mt LSU rDNA*

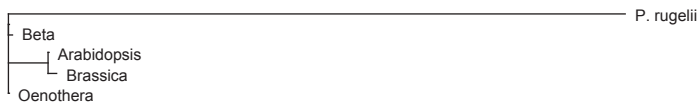

*mt SSU rDNA*

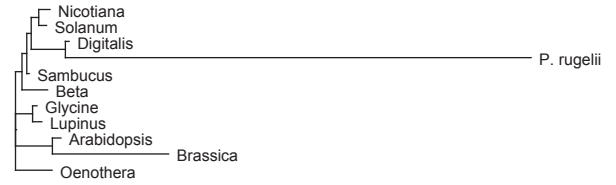

**B** *cp ndhF*

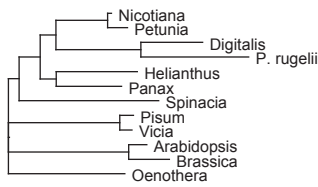

*cp rbcL*

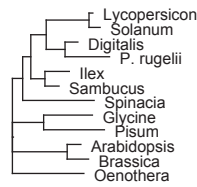

*cp rpoA*

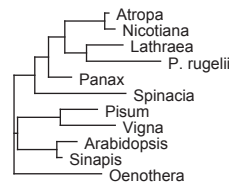

*cp SSU rDNA*

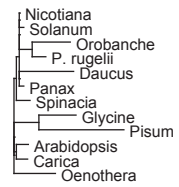

**C**

*nc sut1*

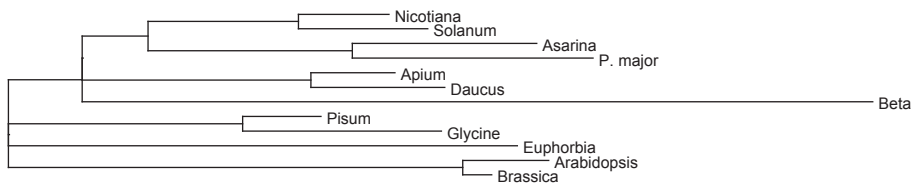

*nc SSU rDNA*

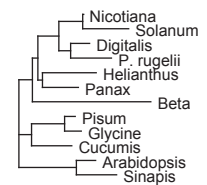

*nc plt1*

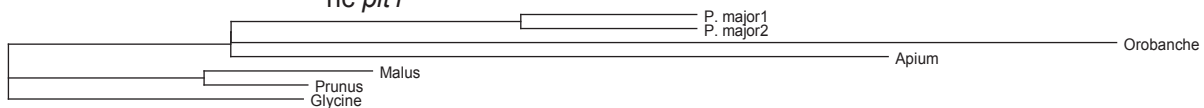

— 0.1 subst./site Protein Genes

— 0.01 subst./site rRNA Genes
