# Supplementary material
Source: PubMed Central journal article supplement (PMC539783)
Supplement: pnas_101_51_17741__3.pdf [file pnas_101_51_17741__3.pdf]

*ndhF*

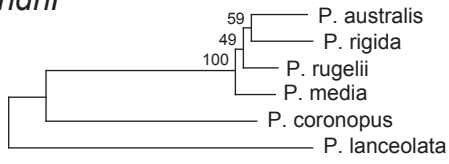

0.01 subst./site

*rbcl*

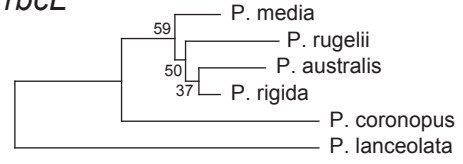

0.01 subst./site

*atpB-rbcl*

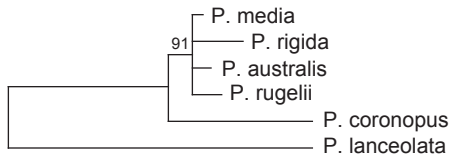

0.01 subst./site

*psaA-trnS*

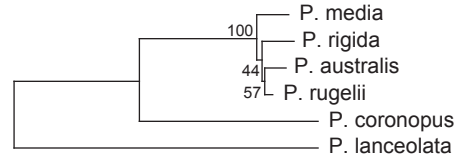

0.01 subst./site

*trnC-trnD*

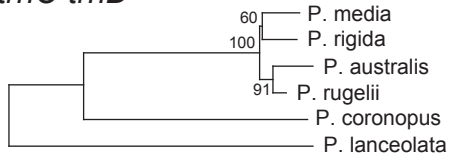

0.01 subst./site

*trnL-trnF*

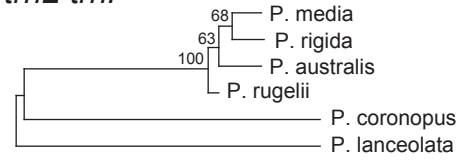

0.01 subst./site
