# Supplementary material
Source: PubMed Central journal article supplement (PMC539783)
Supplement: pnas_101_51_17741__5.pdf [file pnas_101_51_17741__5.pdf]

mt *cox1* - unconstrained

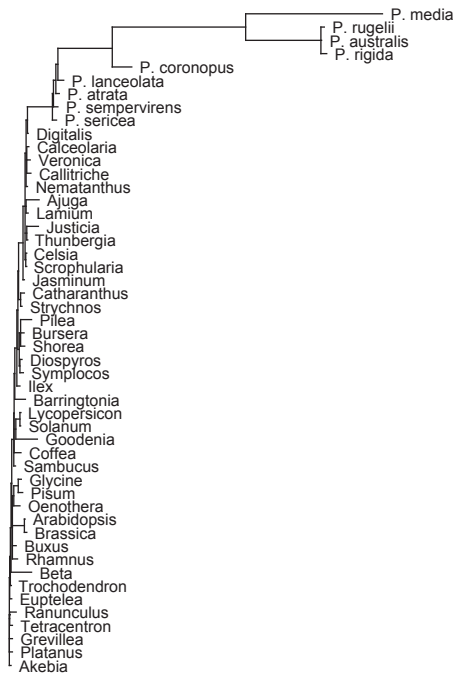

mt *cox1* - constrained

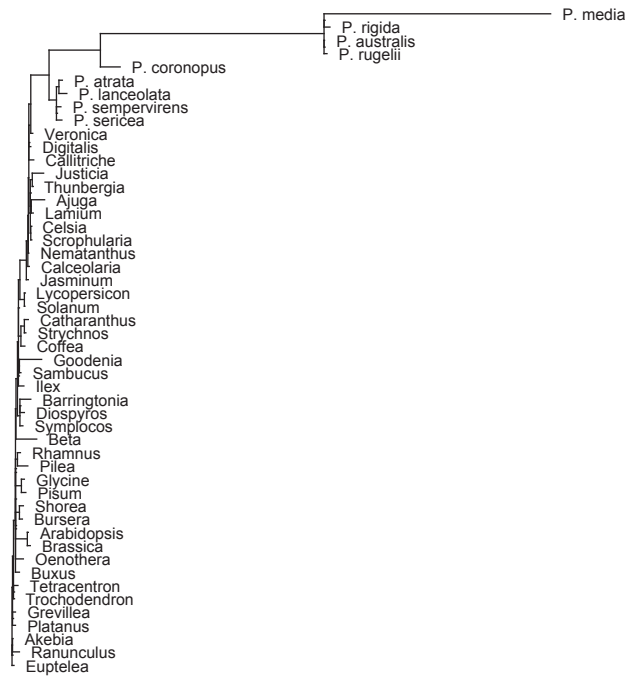

mt *atp1* - unconstrained

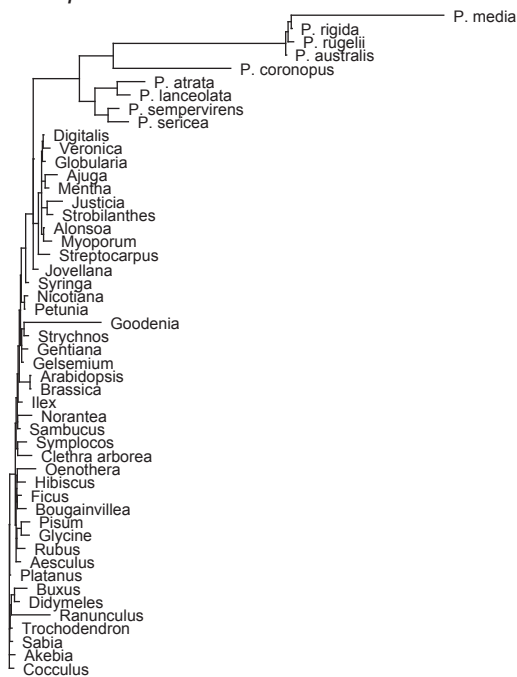

mt *atp1* - constrained

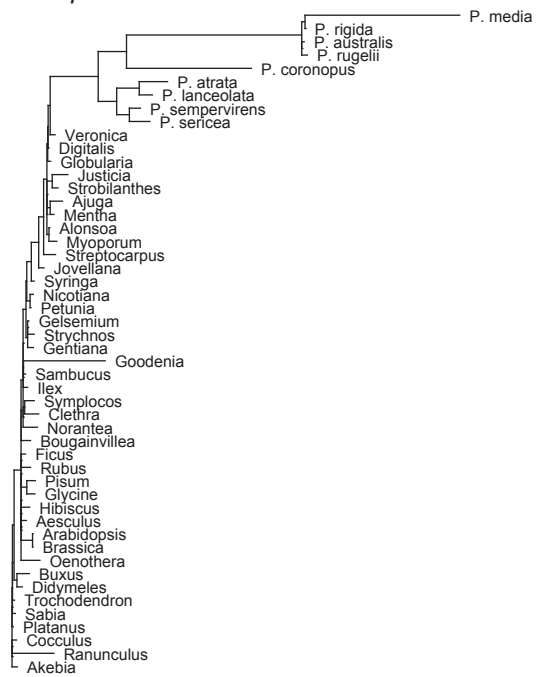

mt SSU rDNA - unconstrained

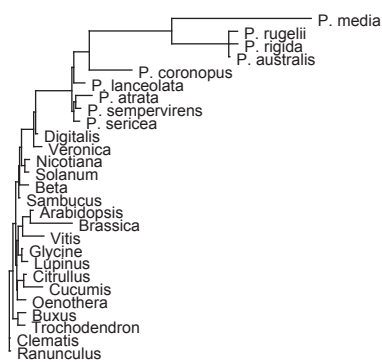

mt SSU rDNA - constrained

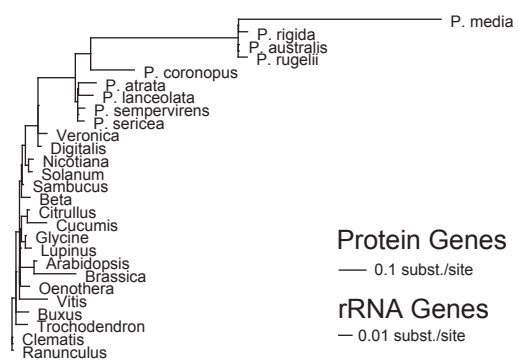

Protein Genes

— 0.1 subst./site

rRNA Genes

— 0.01 subst./site
