# Supplementary material
Source: PubMed Central journal article supplement (PMC539783)

mt *cox1* -  $d_S$

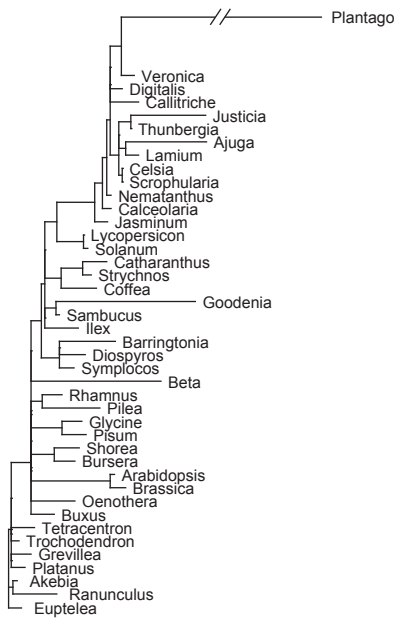

mt *cox1* -  $d_N$

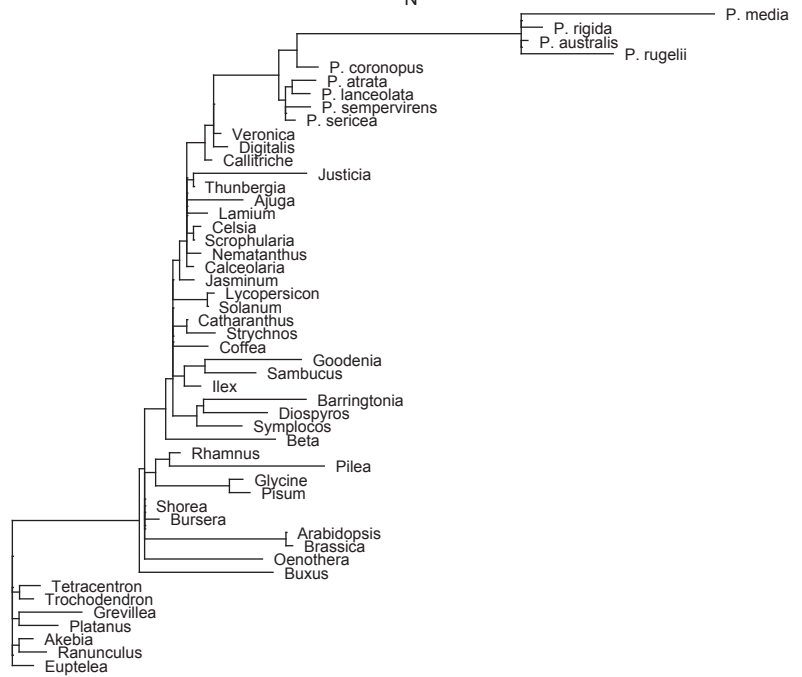

mt *atp1* -  $d_S$

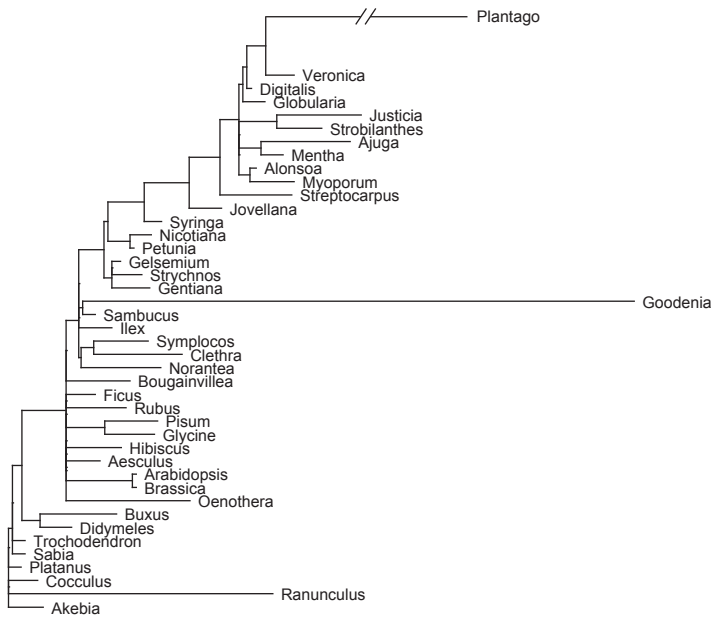

mt *atp1* -  $d_N$

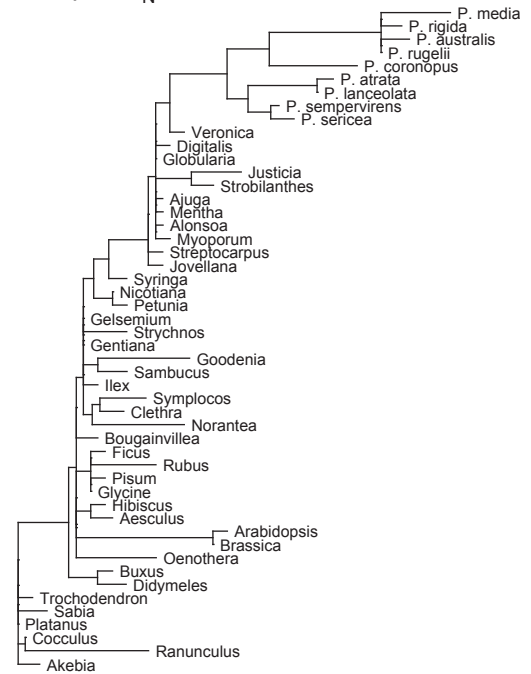

mt SSU rDNA

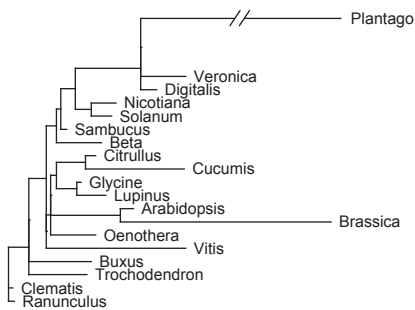

$d_S$  Trees

— 0.1 subst./site

rDNA and  $d_N$  Trees

— 0.01 subs./site

Supplement: pnas_101_51_17741__4.pdf [file pnas_101_51_17741__4.pdf]
